# Supplementary material for: Buried Potential? Evaluating Long-Term Sequestration in a Restored Intertidal Habitat
Source: Research Square preprint supplement (doi:10.21203/rs.3.rs-8682344/v1), 2026-02-04
Supplement: Supplementary file 1 [file 2c8eb2b9edea0de5d0faeb8b.docx]

Supplementary Information

Supplementary Table 1

Summary of GAM results for depth and spatial heterogeneity of variables

| **Variable** | **Zone** | **edf** | **F** | **p-value** | **Depth trend** |
| --- | --- | --- | --- | --- | --- |
| Bulk density | High | 7.50 | 8.74 | <0.001 | Peaks near surface, then declines |
|  | Mid | 5.03 | 3.12 | 0.005 | Declines with depth |
|  | Low | 6.08 | 5.84 | <0.001 | Declines with depth |
|  | Ref | 2.45 | 3.68 | <0.05 | Slight decline |
| Grain size | High | 3.77 | 8.65 | <0.001 | Gradual decline |
|  | Mid | 8.47 | 82.9 | <0.001 | Strong vertical structuring |
|  | Low | 2.91 | 7.04 | <0.001 | Coarser near surface |
|  | Ref | 1.1 | ns | — | Stable |
| Sand | High | 6.45 | 4.37 | <0.001 | Nonlinear |
| Silt | Mid | 10.65 | 6.82 | <0.001 | Nonlinear |
| Clay | High | 8.95 | 3.72 | <0.001 | Nonlinear |
|  | Mid | 6.79 | 2.96 | 0.002 | Nonlinear |

Supplementary Table 2

Summary of GAM performance metrics for models of organic carbon (OC) fractions across restored and reference marsh zones.

| Model | Formula | n | Adjusted_R2 | Deviance_Explained(%) | edf_Range | F_Range | p_value(<) | k_index | Concurvity  (max) |
| --- | --- | --- | --- | --- | --- | --- | --- | --- | --- |
| Total OC | OC ~ s(depth, by = zone) + s(station, bs = 're') | 3987 | 0.631 | 65 | 2.9–5.9 | 12.06–45.12 | 0.001 | 0.92 | 0.31 |
| Labile OC | Labile_OC ~ s(depth, by = zone) + s(station, bs = 're') | 3987 | 0.962 | 96.4 | 9.7–12.5 | 15.2–42.6 | 0.001 | 0.95 | 0.27 |
| Recalcitrant OC | Recalcitrant_OC ~ s(depth, by = zone) + s(station, bs = 're') | 3987 | 0.822 | 83.3 | 8.1–11.9 | 7.9–21.3 | 0.001 | 0.97 | 0.33 |
| Drivers OC | OC ~ s(depth, by = zone) + s(bulk_density) + s(grain_size) | 3987 | 0.62 | 64.0 | 1.3–8.9 | 3.7–18.4 | 0.001 | 0.93 | 0.4 |

Supplementary Table 3

GAM Parametric coefficients (Estimate, Std. Error, t value, p-value) for drivers of OC variation.

Family: Gaussian | Link function: Identity

Formula: OC ~ zone + s(depth, k = 10, id = 1) + s(depth, zone, bs = "fs", k = 20, id = 2) + s(Bulk.density, by = zone, k = 10) + s(Grain.size, by = zone, k = 10) + s(station, bs = "re")

Model fit: R²(adj) = 0.623 | Deviance explained = 64.6% | fREML = 681.94 | Scale est. = 0.11225 | n = 3987

| **Term** | **Estimate** | **Standard Error** | **t value** | **p-value** |
| --- | --- | --- | --- | --- |
| (Intercept) | 3.23908 | 0.07088 | 45.698 | <0.001 |
| zoneLow | -0.76749 | 0.09244 | -8.302 | <0.001 |
| zoneMid | -0.59250 | 0.09015 | -6.573 | <0.001 |
| zoneRef | -0.24340 | 0.14082 | -1.728 | 0.0841 |

Supplementary Table 4

GAM Smooth terms (edf, Ref.df, F, p-value) for drivers of OC variation.

| **Smooth Term** | **edf** | **Ref.df** | **F** | **p-value** |
| --- | --- | --- | --- | --- |
| s(depth) | 3.055 | 3.562 | 2.095 | 0.0837 |
| s(depth,zone) | 11.797 | 76.000 | 1.243 | 3.27e-06 |
| s(Bulk.density):zoneHigh | 1.000 | 1.000 | 2.360 | 0.1246 |
| s(Bulk.density):zoneLow | 2.396 | 3.098 | 3.448 | 0.0153 |
| s(Bulk.density):zoneMid | 2.150 | 2.790 | 1.093 | 0.3856 |
| s(Bulk.density):zoneRef | 1.540 | 1.904 | 1.103 | 0.4077 |
| s(Grain.size):zoneHigh | 1.000 | 1.000 | 0.652 | 0.4197 |
| s(Grain.size):zoneLow | 1.000 | 1.000 | 2.428 | 0.1194 |
| s(Grain.size):zoneMid | 1.946 | 2.456 | 0.898 | 0.3844 |
| s(Grain.size):zoneRef | 1.000 | 1.000 | 0.349 | 0.5549 |
