# Supplementary material for: Buried Potential? Evaluating Long-Term Sequestration in a Restored Intertidal Habitat
Source: Research Square preprint supplement (doi:10.21203/rs.3.rs-8682344/v1), 2026-02-04
Supplement: Supplementary file 2 [file ad9ea27ad3bdfed66d4ff5e5.docx]

R studio script

1. *Data exploration*

hist(data$CHN., main = "Histogram of OC (%)", xlab = "CHN", col = "lightblue")

qqnorm(data$CHN.)

qqline(data$CHN., col = "red")

shapiro.test(data$CHN.)

install.packages("car")

library(car)

# Perform Levene's test for homogeneity of variance

leveneTest(CHN.~ zone, data = data)

1. *Sedimentation accretion and site development*

#Load necessary libraries

library(ggplot2)

edata = read.csv(file.choose(), stringsAsFactors = TRUE)

str(edata)

# Scatter plot with linear regression line

ggplot(edata, aes(x = start.elevation, y = elevation.change)) +

geom_point(aes(color = zone), size = 3) + # Scatter points, color by zone

geom_smooth(method = "lm", se = FALSE, aes(color = "Regression Line")) + # Linear regression line

labs(x = "Initial Elevation (m)", y = "Elevation Change (m)", title = "Initial Elevation vs. Elevation Change") +

theme_minimal() +

theme(legend.position = "bottom")

sum(is.na(edata$zone))

sum(is.na(edata$start.elevation))

sum(is.na(edata$elevation.change))

# Fit the model again with the cleaned data

lm_model <- lm(elevation.change ~ start.elevation, data = edata)

summary(lm_model)

# Fit a linear model with interaction between initial_elevation and zone

lm_model_interaction <- lm(start.elevation ~ elevation.change * zone, data = edata)

# Display the summary of the model

summary(lm_model_interaction)

# Plot with interaction terms

ggplot(edata, aes(y = start.elevation, x = elevation.change, color = zone)) +

geom_point(size = 3) + # Scatter points

geom_smooth(method = "lm", se = FALSE, aes(group = zone)) + # Separate regression lines for each zone

labs(x = "Initial Elevation (m)", y = "Elevation Change (m)") +

theme_minimal() +

theme(legend.position = "bottom")

# Residual plot

edata$residuals <- residuals(lm_model)

edata$fitted <- fitted(lm_model)

ggplot(edata, aes(x = fitted, y = residuals)) +

geom_point() +

geom_hline(yintercept = 0, color = "red", linetype = "dashed") +

labs(x = "Fitted Values", y = "Residuals")

# Q-Q plot for residuals

qqnorm(lm_model$residuals)

qqline(lm_model$residuals, col = "red")

# Leverage vs. residuals plot

plot(lm_model, which = 5) # Leverage vs. Residuals

# Histogram of residuals

ggplot(edata, aes(x = residuals)) +

geom_histogram(bins = 30, fill = "blue", color = "black") +

labs(x = "Residuals", y = "Frequency")

# Cook's Distance plot

plot(lm_model, which = 4)

# Shapiro-Wilk normality test for residuals

shapiro.test(lm_model$residuals) #residuals not normal

###############################################################################

library(MASS)

model_robust <- rlm(elevation.change ~ start.elevation, data = edata)

summary(model_robust)

#Residuals vs fitted

plot(model_robust, which=1)

qqnorm(residuals(model_robust))

qqline(residuals(model_robust), col = "red") # Adds a reference line

plot(model_robust, which = 3) # Scale-Location plot

boxplot(residuals(model_robust), main = "Boxplot of Residuals", ylab = "Residuals")

# Shapiro-Wilk normality test for residuals

shapiro.test(model_robust$residuals) # residuals normal but not showing linearity

###############################################################################

install.packages("mgcv") # Install mgcv package

library(mgcv) # Load the mgcv package

table(edata$zone)

str(edata)

# Ensure 'zone' is treated as a factor

edata$zone <- as.factor(edata$zone)

# Fit the GAM model

# Response: elevation.change

# Predictors: zone (categorical), start.elevation (continuous, smoothed per zone)

gam_model1 <- gam(

elevation.change ~ s(start.elevation, by = izone) + izone,

data = edata,

method = "REML"

)

# Step 3: View summary of the model

summary(gam_model1)

Family: gaussian

Link function: identity

Formula:

elevation.change ~ s(start.elevation, by = izone) + izone

Parametric coefficients:

Estimate Std. Error t value Pr(>|t|)

(Intercept) 0.6321 0.1329 4.758 3.73e-06 ***

izoneL 0.1529 0.2343 0.653 0.515

izoneM 0.1101 0.1570 0.701 0.484

---

Signif. codes: 0 ‘***’ 0.001 ‘**’ 0.01 ‘*’ 0.05 ‘.’ 0.1 ‘ ’ 1

Approximate significance of smooth terms:

edf Ref.df F p-value

s(start.elevation):izoneH 1.000 1.000 8.708 0.00354 **

s(start.elevation):izoneL 6.167 6.682 40.501 < 2e-16 ***

s(start.elevation):izoneM 1.000 1.000 3.715 0.05531 .

---

Signif. codes: 0 ‘***’ 0.001 ‘**’ 0.01 ‘*’ 0.05 ‘.’ 0.1 ‘ ’ 1

R-sq.(adj) = 0.813 Deviance explained = 82.2%

-REML = -9.4334 Scale est. = 0.044524 n = 234

# Step 4: Plot the model

plot(gam_model1, pages = 1, scheme = 1, se = TRUE)

stat_smooth(method = "gam", formula = y ~ s(x),

method.args = list(family = gaussian()),

se = TRUE, color = "black", size = 1.2) +

gam_model2 <- gam(elevation.change ~ s(start.elevation), data = edata)

summary(gam_model2)

# Plot the smooth effect of 'start.elevation' on 'elevation.change'

plot(gam_model, select = 1,

xlab = "Initial elevation (mCD)",

ylab = "Smooth effect of elevation change (mCD)",

font.lab = 2,

cex.axis = 1.5)

# Generate predictions

predictions <- predict(gam_model1)

# Plot predicted vs actual

ggplot(edata, aes(x = predictions, y = elevation.change)) +

geom_point() +

geom_abline(slope = 1, intercept = 0, color = "red") + # 45-degree line

labs(x = "Predicted Elevation Change (mCD)", y = "Actual Elevation Change (mCD)") +

theme(

axis.title.x = element_text(size = 14, face = "bold"), # Bold and larger x-axis title

axis.title.y = element_text(size = 14, face = "bold"), # Bold and larger y-axis title

axis.text.x = element_text(size = 12), # Larger x-axis tick labels

axis.text.y = element_text(size = 12), # Larger y-axis tick labels

plot.title = element_text(size = 16, face = "bold") # Bold and larger plot title

)

# Plot the effect of the 'zone' variable

plot(gam_model1, select = 2, main = "Effect of Zone on Elevation Change")

# Check model diagnostics

gam.check(gam_model1)

###residuals vs fitted

residuals_gam <- residuals(gam_model)

fitted_gam <- fitted(gam_model)

# Plot residuals vs fitted values

plot(fitted_gam, residuals_gam,

xlab = "Fitted Values",

ylab = "Residuals",

pch = 16, col = "black",

cex.lab = 1.5,

font.lab = 2)

# Add a horizontal line at 0 (this helps assess random scatter around 0)

abline(h = 0, col = "red", lwd = 2)

1. *Organic carbon stock and accumulation rates*

soil <- read.csv(file.choose(), stringsAsFactors = TRUE)

str(soil)

library(dplyr)

soil <- soil %>%

mutate(

thickness = bottom - top,

OC_g_cm2 = Bulk.density * (CHN. / 100) * thickness

)

OC_core <- soil %>%

group_by(core_id, zone) %>%

summarise(

OC_stock_g_cm2 = sum(OC_g_cm2),

.groups = "drop"

) %>%

mutate(

OC_stock_t_ha = OC_stock_g_cm2 * 10 # convert g/cm2 to t/ha

)

# To get average per zone:

zone_avg_OC <- OC_core %>%

group_by(zone) %>%

summarise(

mean_OC_t_ha = mean(OC_stock_t_ha, na.rm = TRUE),

sd_OC_t_ha = sd(OC_stock_t_ha, na.rm = TRUE),

n = n(),

.groups = "drop"

)

print(zone_avg_OC)

site_area_ha <- 798000 / 10000 # Convert m² to ha (1 ha = 10,000 m²)

# Use mean OC per ha across all cores

mean_OC_t_ha <- mean(OC_core$OC_stock_t_ha, na.rm = TRUE)

# Total OC stock across the site (in tonnes)

total_OC_site_tonnes <- mean_OC_t_ha * site_area_ha

print(total_OC_site_tonnes) <- 2976.739

OC_accumulation_rate_t_ha_yr <- mean_OC_t_ha / 19 <- 1.963289

###############################################################################

#BOOTSTRAP to estimate uncertainty

###############################################################################

## core based method boot strap

library(boot)

library(dplyr)

str(soil)

# Summarize per core

core_summaries <- soil %>%

group_by(core_id) %>%

summarise(

total_stock_tCha = sum(Bulk.density * (CHN. / 100) * thickness) * 10, # <- multiply by 10 to get t/ha!

.groups = "drop"

) %>%

mutate(accumulation_tChaYr = total_stock_tCha / 19)

# Calculate carbon stock per core in t C/ha

soil$carbon_density <- soil$Bulk.density * (soil$CHN. / 100) # g C/cm³

soil$carbon_stock_gcm2 <- soil$carbon_density * soil$thickness # g C/cm²

soil$carbon_stock_tCha <- soil$carbon_stock_gcm2 # 1 g/cm² = 1 t/ha

soil$carbon_accumulation_tChaYr <- soil$carbon_stock_tCha / 19 # divide by 19 years

# Bootstrap function to resample from the core-level accumulation values

bootstrap_mean <- function(data, indices) {

sampled_data <- data[indices]

return(mean(sampled_data, na.rm = TRUE))

}

# Run the bootstrap on core_summaries

set.seed(123)

boot_result <- boot(data = core_summaries$accumulation_tChaYr,

statistic = bootstrap_mean,

R = 10000)

# 95% confidence interval from bootstrap distribution

ci <- boot.ci(boot_result, type = "perc")$percent[4:5]

# Calculate mean and total site OC accumulation

mean_accumulation <- mean(core_summaries$accumulation_tChaYr)

site_area_ha <- 78.9

total_OC_per_year <- mean_accumulation * site_area_ha

ci_total <- ci * site_area_ha

# Output

cat("Mean OC accumulation rate (t C/ha/yr):", round(mean_accumulation, 2), "\n")

cat("95% CI (t C/ha/yr):", round(ci, 2), "\n")

cat("Total site OC accumulation (t C/yr):", round(total_OC_per_year, 2), "\n")

cat("95% CI for total site OC (t C/yr):", round(ci_total, 2), "\n")

# Output

> cat("Mean OC accumulation rate (t C/ha/yr):", round(mean_accumulation, 2), "\n")

Mean OC accumulation rate (t C/ha/yr): 1.96

> cat("95% CI (t C/ha/yr):", round(ci, 2), "\n")

95% CI (t C/ha/yr): 1.67 2.3

> cat("Total site OC accumulation (t C/yr):", round(total_OC_per_year, 2), "\n")

Total site OC accumulation (t C/yr): 154.9

> cat("95% CI for total site OC (t C/yr):", round(ci_total, 2), "\n")

95% CI for total site OC (t C/yr): 131.75 181.29

> summary(soil$carbon_accumulation_tChaYr)

Min. 1st Qu. Median Mean 3rd Qu. Max.

0.003993 0.006657 0.007572 0.007699 0.008637 0.012983

> sd(soil$carbon_accumulation_tChaYr)

[1] 0.001464428

#distribution of OC accumulation plot

library(ggplot2)

ggplot(data.frame(bootstrap = boot_result$t), aes(x = bootstrap)) +

geom_density(fill = "lightblue") +

labs(x = "OC Accumulation (t C/ha/yr)", title = "Bootstrap Distribution of OC Accumulation") +

theme_minimal()

1. *Temporal and Spatial Patterns of Sediment Properties and OC*

*#GAMM to model non-linear changes in organic carbon with depth while accounting*

*#for repeated measures within sediment cores. Depth (top) was included as a smooth term,*

*#elevation zone as a fixed effect, and core ID (station) as a random intercept.”*

*################################################################################*

*##### depth variation analysis*

*###cant use this as the data is not linear*

*library(lme4)*

*# linear mixed-effects model*

*model <- lmer(CHN. ~ top + zone + (1 | station), data = data)*

*model2 <- lmer(CHN. ~ top * zone + (1 | station), data = data)*

*# Summarise the model*

*summary(model)*

*summary(model2)*

*# 1. Check residuals*

*residuals <- residuals(model)*

*shapiro.test(residuals(model))*

*shapiro.test(residuals(model2))*

*# Standardised (Pearson) residuals for mixed model*

*standardised_residuals <- residuals(model, type = "pearson")*

*# Plot histogram of residuals*

*hist(standardised_residuals)*

*# Plot residuals vs fitted values to check for patterns*

*fitted_values <- fitted(model)*

*plot(fitted_values, standardised_residuals)*

*abline(h = 0, col = "red")*

*# 2. Cook's Distance*

*cooks_dist <- cooks.distance(model)*

*# Plot Cook's Distance*

*plot(cooks_dist, type = "h", main = "Cook's Distance", ylab = "Cook's Distance")*

*# Identify influential points*

*influential_points <- which(cooks_dist > 1) # or use a threshold of your choice*

*# 3. Leverage*

*leverage <- hatvalues(model)*

*plot(leverage)*

*# 4. DFBETAs*

*dfbetas <- dfbetas(model)*

*summary(dfbetas)*

*# 5. Influence Plot*

*library(car)*

*influencePlot(model) # requires car package*

*str(data)*

*data$zone <- relevel(data$zone, ref = "R") #makes r zone the reference for the model*

*# Fit a mixed-effects model with an interaction term between Depth and Zone*

*model_interaction <- lmer(CHN. ~ top * zone + (1 | station), data = data)*

*# Summarize the model*

*summary(model_interaction)*

*shapiro.test(residuals(model_interaction)) # still not normal*

*# Using mgcv's gamm function*

*library(mgcv)*

*model_gamm <- gamm(CHN. ~ zone + s(top, by = zone, k = 30), random = list(station = ~1), data = data)*

*#check diagnostics*

*plot(model_gamm$gam, pages = 1)*

*gam.check(model_gamm$gam)*

*###The estimated degrees of freedom (edf) are still well below k':edfs: ~1 to ~6*

*#k': 29 → This means the smoothers are not hitting the complexity limit.*

*#The k-index is stable (0.92) and hasn't changed from previous models.*

*#P-values are very low, but that’s not necessarily a problem when edf << k'.*

*# Check model summary*

*summary(model_gamm$lme)*

*ranef(model_gamm$lme)*

*# Check model summary*

*summary(model_gamm3$lme)*

*################################################################################*

*### Visualize the correlation between OC and other variables*

*###exploratory analysis*

*str(data)*

*library(corrplot)*

*# Create a correlation matrix for OC and other variables*

*# Calculate the correlation matrix*

*corr_matrix <- cor(data[, c("CHN.", "Bulk.density", "Grain.size", "sand", "silt", "clay")],*

*use = "pairwise.complete.obs", method = "spearman")*

*# Define custom labels*

*custom_labels <- c("OC %", "Dry Bulk Density g cm\u00b3", "Grain size µg", "sand %", "silt%", "clay%")*

*# Set the colnames of the correlation matrix to the custom labels*

*colnames(corr_matrix) <- custom_labels*

*rownames(corr_matrix) <- custom_labels*

*# Create the correlation plot with custom labels*

*corrplot(corr_matrix,*

*method = "circle",*

*type = "upper",*

*tl.cex = 0.8,*

*tl.col = "black",*

*tl.srt = 45)*

*############################################################################*

*#### calculating surface sediments*

*library(dplyr)*

*library(ggplot2)*

*library(tidyr)*

*# List of sediment properties*

*props <- c("Bulk.density", "Grain.size", "sand", "silt", "clay", "OC%")*

*# Compute variance and SD for each 5 cm segment*

*variance_table <- data %>%*

*group_by(depth) %>%*

*summarise(across(all_of(props),*

*list(var = ~var(.x, na.rm = TRUE),*

*sd = ~sd(.x, na.rm = TRUE)),*

*.names = "{col}_{fn}"),*

*n = n(),*

*.groups = "drop")*

*print(variance_table)*

*# Optional: reshape for plotting*

*variance_long <- variance_table %>%*

*pivot_longer(cols = -c(depth, n),*

*names_to = c("variable", "stat"),*

*names_sep = "_") %>%*

*filter(stat == "var") # or "sd" if you prefer*

*# Plot variance vs depth*

*ggplot(variance_long, aes(x = depth, y = value, color = variable)) +*

*geom_line(size = 1) +*

*geom_point(size = 2) +*

*labs(x = "Depth (cm)", y = "Variance", color = "Property") +*

*theme_minimal()*

*# View variance for OC*

*variance_table %>%*

*select(depth, OC%_var, OC%_sd) %>%*

*print(n = 20) # show first 20 rows*

*#####descriptive*

*#Filter only top 40 cm*

*surface_summary <- data %>%*

*filter(top <= 40) %>%*

*group_by(zone) %>%*

*summarise(*

*# Bulk density*

*bd_median = median(Bulk.density, na.rm = TRUE),*

*bd_se = sd(Bulk.density, na.rm = TRUE) / sqrt(sum(!is.na(Bulk.density))),*

*# Grain size*

*gs_median = median(Grain.size, na.rm = TRUE),*

*gs_se = sd(Grain.size, na.rm = TRUE) / sqrt(sum(!is.na(Grain.size))),*

*# Sand*

*sand_median = median(sand, na.rm = TRUE),*

*sand_se = sd(sand, na.rm = TRUE) / sqrt(sum(!is.na(sand))),*

*# Silt*

*silt_median = median(silt, na.rm = TRUE),*

*silt_se = sd(silt, na.rm = TRUE) / sqrt(sum(!is.na(silt))),*

*# Clay*

*clay_median = median(clay, na.rm = TRUE),*

*clay_se = sd(clay, na.rm = TRUE) / sqrt(sum(!is.na(clay))),*

*# Organic carbon*

*chn_median = median(OC%, na.rm = TRUE),*

*chn_se = sd(OC%, na.rm = TRUE) / sqrt(sum(!is.na(CHN.))),*

*.groups = "drop"*

*)*

*print(surface_summary)*

*############################################################################*

*Variation in environmental variables*

*##BD*

*library(mgcv)*

*gam_BD <- gam(*

*Bulk.density ~ zone + s(depth, by = zone, k = 10) + s(station, bs = "re"),*

*method = "REML",*

*data = data*

*)*

*# Make sure data is ordered*

*data <- data[order(data$station, data$top), ]*

*# Get model residuals in matching order*

*res <- residuals(gam_BD)*

*# Core (station) IDs*

*core_ids <- data$station*

*rho_vals <- numeric()*

*for (core in unique(core_ids)) {*

*core_res <- res[core_ids == core]*

*if (length(core_res) > 1) {*

*rho_vals <- c(rho_vals, cor(core_res[-1], core_res[-length(core_res)]))*

*}*

*}*

*rho_est <- mean(rho_vals, na.rm = TRUE)*

*rho_est #tells the model that each 5 cm section is positively correlated with the previous section in the same core.*

*# Create AR.start flag for each core*

*data$AR.start <- c(TRUE, diff(as.numeric(data$station)) != 0)*

*# Fit BAM with AR(1) correlation*

*#refit bulk density model in bam() using this rho value:*

*bam_BD <- bam(*

*Bulk.density ~ zone + s(depth, by = zone, k = 15) + s(station, bs = "re"),*

*data = data,*

*method = "REML",*

*rho = 0.434, # your estimated AR(1) correlation*

*AR.start = data$AR.start*

*)*

*# Fit BAM with AR(1) correlation and factor-smooth interaction*

*bam_BD2 <- bam(*

*Bulk.density ~ zone +*

*s(depth, by = zone, k = 15) + # more flexible depth smooth per zone*

*s(station, bs = "re") + # random intercept for cores*

*s(depth, station, bs = "fs", k = 5), # core-specific depth profiles (factor-smooth interaction)*

*data = data,*

*method = "fREML",*

*rho = 0.434, # AR(1) from residuals*

*AR.start = data$AR.start,*

*family = gaussian()*

*)*

*# Check diagnostics*

*gam.check(bam_BD2)*

*gam.check(bam_BD) # check diagnostics*

*plot(bam_BD, pages=1, rug=TRUE) # plot smooths per zone*

*preds <- predict(bam_BD, type="response", se.fit=TRUE) # extract predictions for reporting*

*summary(bam_BD)*

*summary(bam_BD2)*

*###############################################################################*

*###OC variation*

*Justification why bam not gamm*

gamm()

- Uses lme() from nlme internally for random effects.
- Handles nested/hierarchical data well but is slower with large datasets.
- Random effects are fit using REML via mixed model machinery, which can be less efficient with many levels (e.g., many cores).
- Limited in handling factor-smooth interactions efficiently for large datasets.

2. bam()

- Stands for “Big Additive Model”; optimized version of gam() for large datasets.
- Can handle thousands of observations quickly.
- Supports complex smooths, factor-smooth interactions, and random effects via s(core, bs="re").
- Uses fREML for fast, stable estimation.
- Optional discretization (discrete=TRUE) speeds up computation for large data without losing accuracy.

*gam_OC <- gam(*

*OC% ~ zone + s(depth, by = zone, k = 10) + s(station, bs = "re"),*

*method = "REML",*

*data = data*

*)*

*# Make sure data is ordered*

*data <- data[order(data$station, data$top), ]*

*# Get model residuals in matching order*

*res <- residuals(gam_OC)*

*# Core (station) IDs*

*core_ids <- data$station*

*rho_vals <- numeric()*

*for (core in unique(core_ids)) {*

*core_res <- res[core_ids == core]*

*if (length(core_res) > 1) {*

*rho_vals <- c(rho_vals, cor(core_res[-1], core_res[-length(core_res)]))*

*}*

*}*

*rho_est <- mean(rho_vals, na.rm = TRUE)*

*rho_est #tells the model that each 5 cm section is positively correlated with the previous section in the same core.*

*# Create AR.start flag for each core*

*data$AR.start <- c(TRUE, diff(as.numeric(data$station)) != 0)*

*# Fit BAM with AR(1) correlation*

*#refit OC model in bam() using this rho value:*

*bam_OC <- bam(*

*OC% ~ zone + s(depth, by = zone, k = 10) + s(station, bs = "re"),*

*data = data,*

*method = "REML",*

*rho = 0.363, # your estimated AR(1) correlation*

*AR.start = data$AR.start*

*)*

*gam.check(bam_OC) # check diagnotics*

*plot(bam_OC, pages=1, rug=TRUE) # plot smooths per zone*

*summary(bam_OC)*

*###############################################################################*

*#############grain size variation*

*gam_GS <- gam(*

*Grain.size ~ zone + s(depth, by = zone, k = 10) + s(station, bs = "re"),*

*method = "REML",*

*data = data*

*)*

*# Make sure data is ordered*

*data <- data[order(data$station, data$top), ]*

*# Get model residuals in matching order*

*res <- residuals(gam_GS)*

*# Core (station) IDs*

*core_ids <- data$station*

*rho_vals <- numeric()*

*for (core in unique(core_ids)) {*

*core_res <- res[core_ids == core]*

*if (length(core_res) > 1) {*

*rho_vals <- c(rho_vals, cor(core_res[-1], core_res[-length(core_res)]))*

*}*

*}*

*rho_est <- mean(rho_vals, na.rm = TRUE)*

*rho_est #tells the model that each 5 cm section is positively correlated with the previous section in the same core.*

*# Create AR.start flag for each core*

*data$AR.start <- c(TRUE, diff(as.numeric(data$station)) != 0)*

*# Fit BAM with AR(1) correlation*

*#refit grain size model in bam() using this rho value:*

*bam_GS <- bam(*

*Grain.size ~ zone + s(depth, by = zone, k = 10) + s(station, bs = "re"),*

*data = data,*

*method = "REML",*

*rho = 0.17, # your estimated AR(1) correlation*

*AR.start = data$AR.start*

*)*

*gam.check(bam_GS) # check diagnotics*

*plot(bam_GS, pages=1, rug=TRUE) # plot smooths per zone*

*summary(bam_GS)*

*##############################################################################*

*#####sediment composition*

*summary_table <- data %>%*

*group_by(zone) %>%*

*summarise(*

*# Bulk density*

*bd_median = median(Bulk.density, na.rm = TRUE),*

*bd_se = sd(Bulk.density, na.rm = TRUE) / sqrt(sum(!is.na(Bulk.density))),*

*# Grain size*

*gs_median = median(Grain.size, na.rm = TRUE),*

*gs_se = sd(Grain.size, na.rm = TRUE) / sqrt(sum(!is.na(Grain.size))),*

*# Sand*

*sand_median = median(sand, na.rm = TRUE),*

*sand_se = sd(sand, na.rm = TRUE) / sqrt(sum(!is.na(sand))),*

*# Silt*

*silt_median = median(silt, na.rm = TRUE),*

*silt_se = sd(silt, na.rm = TRUE) / sqrt(sum(!is.na(silt))),*

*# Clay*

*clay_median = median(clay, na.rm = TRUE),*

*clay_se = sd(clay, na.rm = TRUE) / sqrt(sum(!is.na(clay))),*

*.groups = "drop"*

*)*

*print(summary_table)*

*# Ensure data is ordered by core and depth*

*data <- data[order(data$station, data$top), ]*

*# AR.start flag for first subsection in each core*

*data$AR.start <- c(TRUE, diff(as.numeric(data$station)) != 0)*

*estimate_rho <- function(response) {*

*res <- residuals(gam(response ~ s(depth) + s(station, bs="re"), data=data, method="REML"))*

*rho_vals <- numeric()*

*for(core in unique(data$station)) {*

*core_res <- res[data$station == core]*

*if(length(core_res) > 1) {*

*rho_vals <- c(rho_vals, cor(core_res[-1], core_res[-length(core_res)]))*

*}*

*}*

*mean(rho_vals, na.rm=TRUE)*

*}*

*rho_sand <- estimate_rho(data$sand)*

*rho_silt <- estimate_rho(data$silt)*

*rho_clay <- estimate_rho(data$clay)*

*# mvbind combines the response variables*

*bam_sand <- bam(sand ~ zone + s(depth, by=zone, k=15) + s(station, bs="re"),*

*data = data,*

*method = "fREML",*

*rho = rho_sand,*

*AR.start = data$AR.start)*

*bam_silt <- bam(silt ~ zone + s(depth, by=zone, k=15) + s(station, bs="re"),*

*data = data,*

*method = "fREML",*

*rho = rho_silt,*

*AR.start = data$AR.start)*

*bam_clay <- bam(clay ~ zone + s(depth, by=zone, k=15) + s(station, bs="re"),*

*data = data,*

*method = "fREML",*

*rho = rho_clay,*

*AR.start = data$AR.start)*

*# Check residuals and smooths*

*gam.check(bam_sand)*

*gam.check(bam_silt)*

*gam.check(bam_clay)*

*# Plot smooths for each zone*

*plot(bam_sand, pages = 1, rug = TRUE)*

*plot(bam_silt, pages = 1, rug = TRUE)*

*plot(bam_clay, pages = 1, rug = TRUE)*

*summary(bam_sand)*

*summary(bam_silt)*

*summary(bam_clay)*

*######################################################################*
